# Supplementary material for: Ultra-fine surface solid-state electrolytes for long cycle life all-solid-state lithium–air batteries
Source: Royal Society of Chemistry journal article supplement (doi:10.1039/c8ta08095j), 2018-01-01
Supplement: c8ta08095j1.pdf [file c8ta08095j1.pdf]

## Ultra-fine Surface Solid-State Electrolyte for Long Cycle Life All-Solid-State Lithium-Air Battery

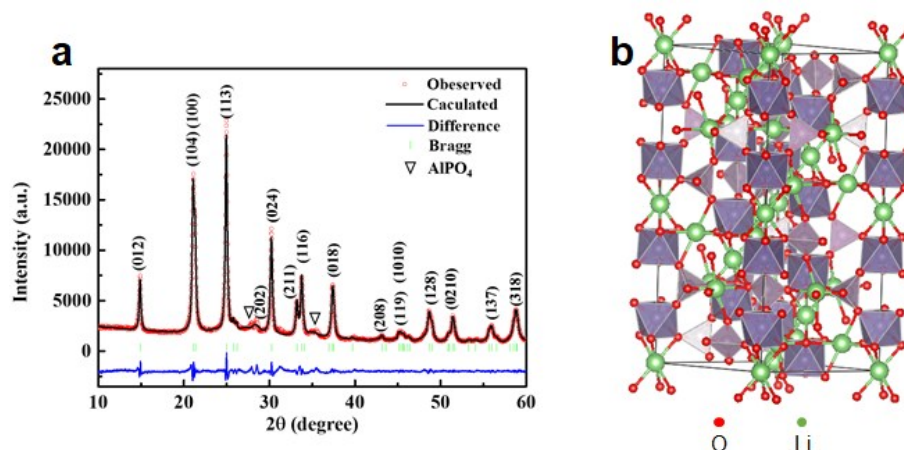

**Figure S1** a) The X-ray diffraction pattern (XRD) characterization of LAGP electrolyte. b) Crystal structure of NASICON-type LAGP. The prepared LAGP has a rhombohedral structure with space group  $R3c$ , and an open three-dimensional framework sharing all corners of GeO<sub>6</sub> octahedra with PO<sub>4</sub> tetrahedra.

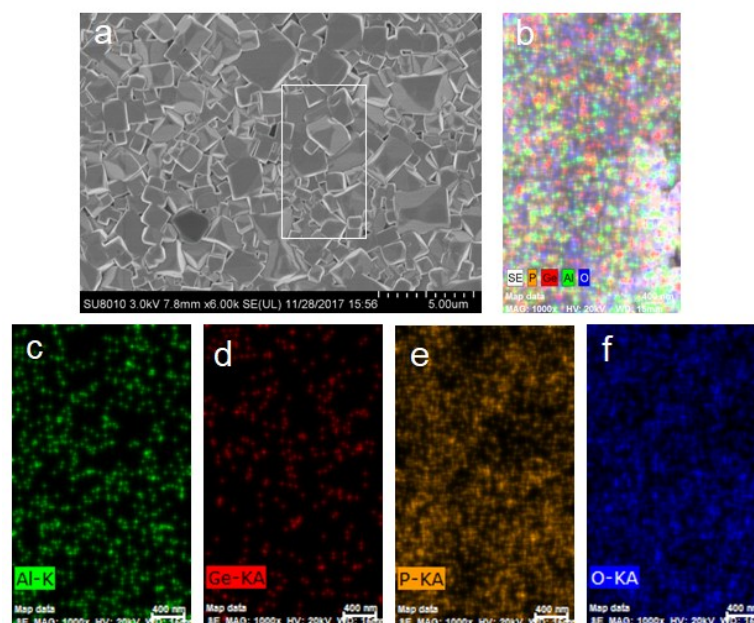

**Figure S2** (a) SEM image and (b-f) EDS mapping of LAGP with protrusions.

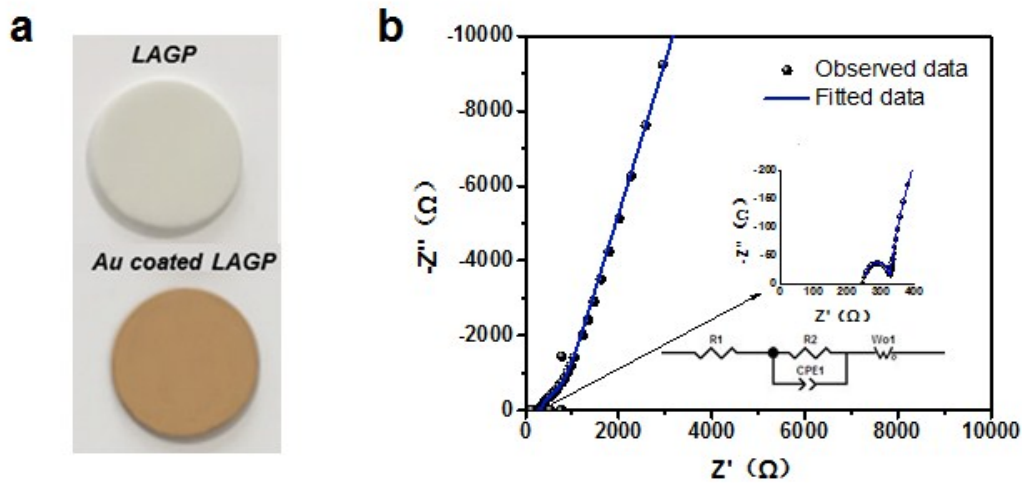

**Figure S3** a) Optical image of LAGP pellet before and after coating Au film. b) The electrochemical impedance spectroscopy plots of the LAGP pellet using Au/LAGP/Au symmetric battery. The inside figure (Fig. S3b) is Nyquist plot and an equivalent circuit. The perturbation voltage is 5mV in the frequency range of 1 MHz to 0.1 Hz. In the equivalent circuit diagram, R1 is the bulk resistance; R2 is the grainboundary resistance and CPE1 is a constant phase element; Wo1 is the Warburg diffusion resistance. The R1 is 251.8  $\Omega$  and the R2 is 72.3  $\Omega$ . In addition, the thickness (L) and the diameter (D) of the LAGP pellet is 0.1 cm and 1.7 cm, respectively. Finally, the total conductivity of the LAGP pellet is about  $3.9 \times 10^{-4} \text{ S cm}^{-1}$  according to formula (1) in which S is the surface area and R is the sum of R1 and R2.

$$\sigma = \frac{L}{S \times R} \quad (1)$$

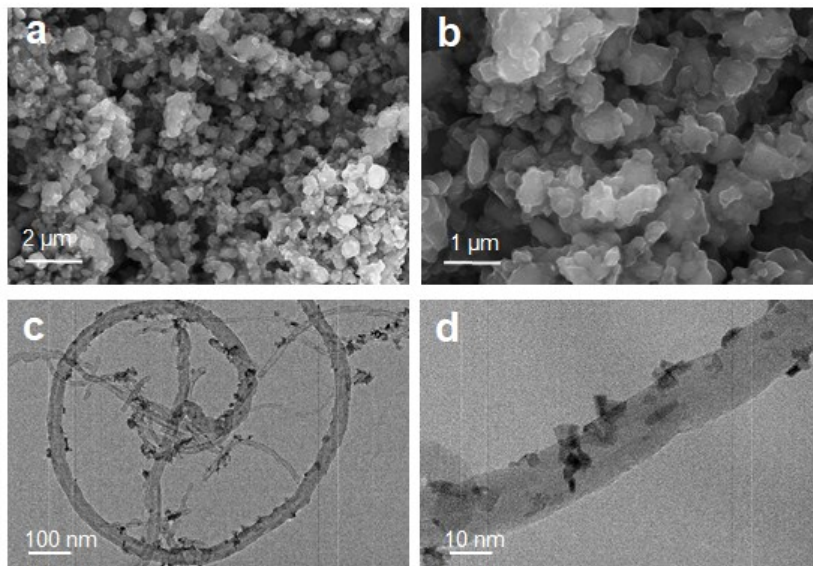

**Figure S4** (a, b) SEM images of 3D air electrode ( $\text{RuO}_2/\text{CNT}/\text{LAGP}$ ). (c, d) TEM images of  $\text{RuO}_2/\text{CNT}$ . Air cathode using  $\text{RuO}_2$  and CNT as catalyst and LAGP particles as Li-ion transport medium. The complex of CNT (wall thickness  $\sim 30 \text{ nm}$ , Fig. S4d) and  $\text{RuO}_2$  ( $\sim$

10 nm, Fig. S4d) as catalyst can significantly reduce overpotential of Li-Air battery during the cycle. The introduction of LAGP nanoparticles (~500 nm to ~1  $\mu$ m, Fig. S4b) could ensure an effective Li-ion transmission of the cathode even in areas beyond the LAGP ceramic membrane.

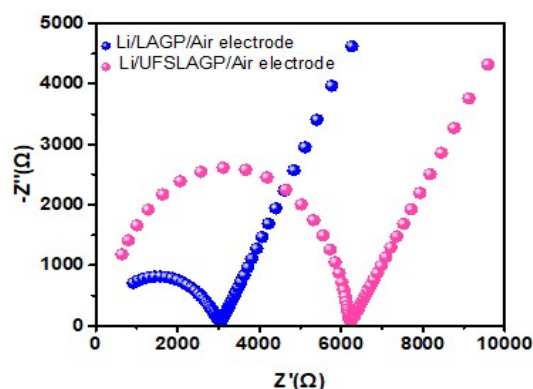

Figure S5 Electrochemical impedance spectroscopy plots of the all-solid-state Li-Air cell based on LAGP with protrusions and UFLAGP electrolyte, respectively. Among them, the interface impedance of Li-Air battery based on LAGP with protrusions is about 6000  $\Omega$ . The interface impedance of Li-Air battery based on UFLAGP is about 3000  $\Omega$ .

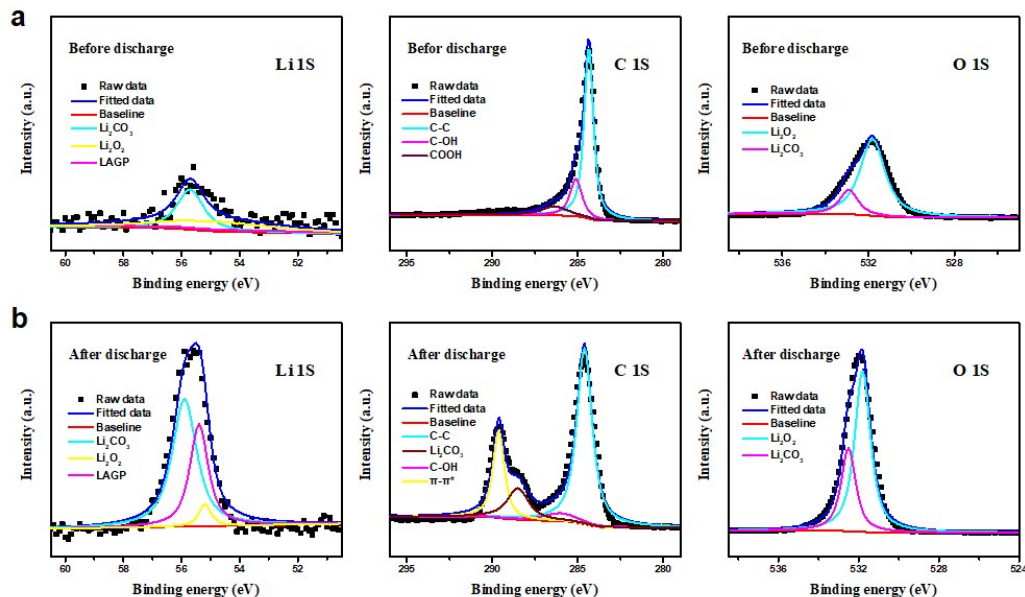

Figure S6. High-resolution XPS spectra (Li1s, C1s and O1s) of the air cathode for Li-Air battery based on LAGP with protrusions before (a) and after (b) discharge. Corresponds to the formation of the reported discharging products, including  $\text{Li}_2\text{O}_2$ ,  $\text{Li}_2\text{CO}_3$  and  $\text{LiOH}$ .

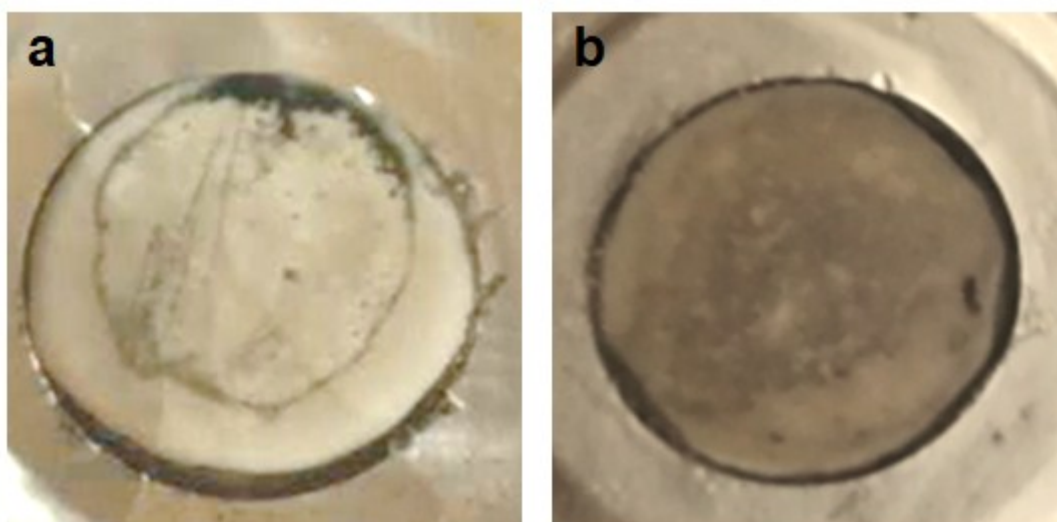

Figure S7 Optical photo of the cycled all-solid-state Li-Air battery based on LAGP with protrusions (a) and (b) UFSLAGP after removing the air electrode.

Table 1: A summary of the performances of solid-state Li-Air batteries at room temperature (RT) in the literature,<sup>4,11,12,24,25,46</sup> in comparison to what is achieved in this work.

| Types                            | Electrolyte        | Cathode                        | Current density            | Capacity (mAh g <sup>-1</sup> ) | Temperature (°C) | Cycles | Ref.      |
|----------------------------------|--------------------|--------------------------------|----------------------------|---------------------------------|------------------|--------|-----------|
| All-solid-state Li-Air battery   | LAGP               | CNT/LAGP                       | 500 mAg <sup>-1</sup><br>1 | 1700                            | RT               | 1      | 4         |
| Quasi-solid-state Li-Air battery | LATP               | Pt                             | 0.5 mA cm <sup>-2</sup>    | 221                             | RT               | 20     | 46        |
| All-solid-state Li-Air battery   | Polymer film +LAGP | CNT/LAGP                       | 10 mAg <sup>-1</sup>       | 400                             | RT               | 1      | 11        |
| All-solid-state Li-Air battery   | LAGP               | CNT/LAGP                       | 400 mAg <sup>-1</sup><br>1 | 1000                            | RT               | 10     | 12        |
| Quasi-solid-state Li-Air battery | LLZO               | CNT/RuO <sub>2</sub> /LAGP +IL | 0.1 C                      | --                              | 20               | 10     | 25        |
| Quasi-solid-state Li-Air battery | LAGP               | CNT/RuO <sub>2</sub> /LAGP +IL | 200 mAg <sup>-1</sup><br>1 | 1000                            | RT               | 9      | 24        |
| All-solid-state Li-Air battery   | LAGP               | CNT/RuO <sub>2</sub> /LAGP     | 400 mAg <sup>-1</sup><br>1 | 1000                            | RT               | 27     | This Work |
